# Supplementary material
Source: Springer Nature journal article supplement (https://www.springermedizin.de/resource/supplementary/12911_2011_499_MOESM4_ESM.pdf/9526020)

**(a) Tokyo**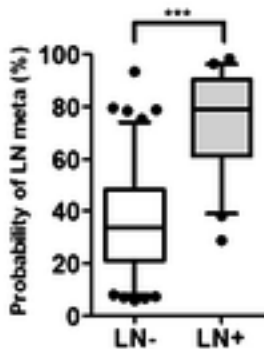**(b) Kyoto**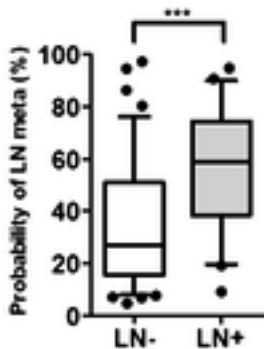**(c) Seoul**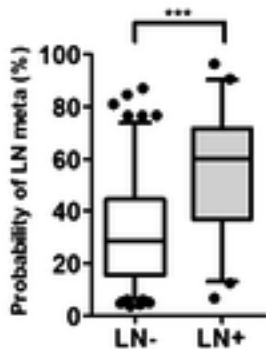

Supplement: MOESM4 [file 9526020]
